# Supplementary material for: A theoretical study of the catalytic mechanism of oxalyl-CoA decarboxylase, an enzyme for treating urolithiasis
Source: Royal Society of Chemistry journal article supplement (doi:10.1039/c4ra03611e), 2014-08-05

## A theoretical study on the catalytic mechanism of oxalyl-CoA decarboxylase, an enzyme for treating urolithiasis

Xiang Sheng<sup>a</sup>, Yongjun Liu<sup>\*a,b</sup>, Rui Zhang<sup>c</sup>

<sup>a</sup>School of Chemistry and Chemical Engineering, Shandong University, Jinan, Shandong 250100, China

<sup>b</sup>Northwest Institute of Plateau Biology, Chinese Academy of Sciences, Xining, Qinghai 810001, China

<sup>c</sup>School of Agriculture, Ludong University, Yantai, Shandong 264025, China

Fig. S1 The energy profile of proton transfer process from 4'-NH<sub>2</sub> to the hydroxyl anion using IM2 as the starting structure.

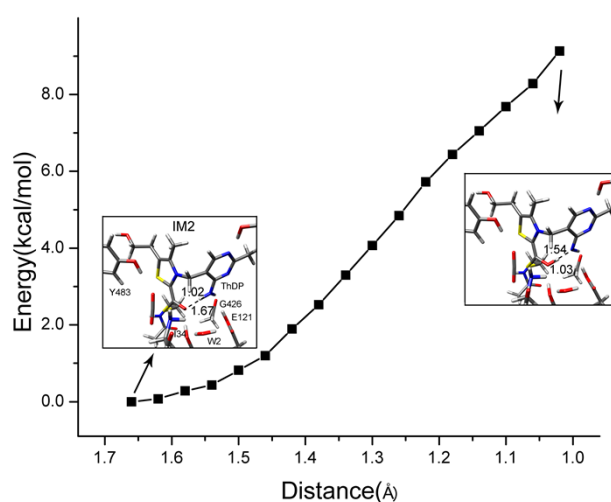

Fig. S2 The energy profile of proton transfer process from 4'-NH<sub>2</sub> to the hydroxyl anion using IM3 as the starting structure.

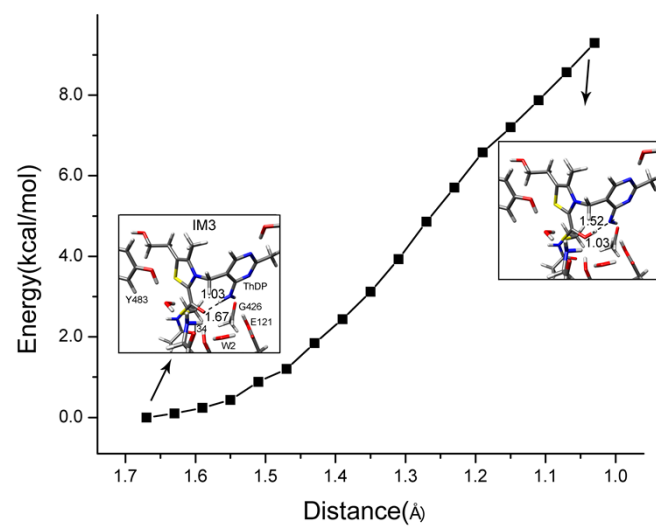

Supplement: c4ra03611e1.pdf [file c4ra03611e1.pdf]
